# Supplementary material for: FTO demethylase activity is essential for normal bone growth and bone mineralization in mice
Source: PubMed Central journal article supplement — Biochim Biophys Acta. 2018 Mar;1864(3):843–50. doi: 10.1016/j.bbadis.2017.11.027 (PMC5798602; doi:10.1016/j.bbadis.2017.11.027), 2018-03
Supplement: mmc2.pdf [file mmc2.pdf]

## **Multiple files are bound together in this PDF Package.**

Adobe recommends using Adobe Reader or Adobe Acrobat version 8 or later to work with documents contained within a PDF Package. By updating to the latest version, you'll enjoy the following benefits:

- Efficient, integrated PDF viewing
- Easy printing
- Quick searches

**Don't have the latest version of Adobe Reader?**

**[Click here to download the latest version of Adobe Reader](#)**

**If you already have Adobe Reader 8,  
click a file in this PDF Package to view it.**
